1 **Two Decades of Endemic Dengue in Bangladesh (2000-2022): Trends,**  
2 **Seasonality, and impact of Temperature and Rainfall Patterns on transmission**  
3 **dynamics**

4  
5 **Mohammad Nayeem Hasan<sup>1</sup>, Ibrahim Khalil<sup>2</sup>, Muhammad Abdul Baker Chowdhury<sup>3</sup>,**  
6 **Mahbubur Rahman<sup>4,5</sup>, Md Asaduzzaman<sup>6</sup>, Masum Billah<sup>6</sup>, Laila Arjuman Banu<sup>7</sup>,**  
7 **Mahbub-ul Alam<sup>8</sup>, Atik Ahsan<sup>8</sup>, Tieble Traore<sup>9</sup>, Md. Jamal Uddin<sup>1,10</sup> Roberto Galizi<sup>11</sup>,**  
8 **Ilaria Russo<sup>12</sup>, Alimuddin Zumla<sup>13</sup>, Najmul Haider<sup>11\*</sup>**

9  
10 <sup>1</sup> Department of Statistics, Shahjalal University of Science and Technology, Sylhet 3114,  
11 Bangladesh (MNH: [nayeem5847@gmail.com](mailto:nayeem5847@gmail.com), MJU: [jamal-sta@sust.edu](mailto:jamal-sta@sust.edu))

12  
13 <sup>2</sup> Department of Livestock Services, Ministry of Fisheries and Livestock, Bangladesh, Dhaka,  
14 Bangladesh (IK: [dribrahim.dls@gmail.com](mailto:dribrahim.dls@gmail.com))

15  
16 <sup>3</sup> Department of Neurosurgery, University of Florida College of Medicine, Gainesville, Florida  
17 FL 32610, USA (MABC: [baker.chowdhury@neurosurgery.ufl.edu](mailto:baker.chowdhury@neurosurgery.ufl.edu) )

18  
19 <sup>4</sup> The Royal Veterinary College, University of London, Hawkshead Lane, North Mymms,  
20 Hatfield, Hertfordshire, United Kingdom (Email: MR: [dr\\_mahbub@yahoo.com](mailto:dr_mahbub@yahoo.com))

21  
22 <sup>5</sup> Institute of Epidemiology, Disease Control and Research (IEDCR), Ministry of Health and  
23 Family Welfare, Mohakhali, Dhaka, Bangladesh (MR: [dr\\_mahbub@yahoo.com](mailto:dr_mahbub@yahoo.com))

24  
25 <sup>6</sup> School of Digital, Technologies, and Arts, Staffordshire University, Staffordshire, UK (MB:  
26 [masum.billah@staffs.ac.uk](mailto:masum.billah@staffs.ac.uk) , MA: [Md.Asaduzzaman@staffs.ac.uk](mailto:Md.Asaduzzaman@staffs.ac.uk))

27  
28 <sup>7</sup> Department of Anatomy, Bangabandhu Sheikh Mujib Medical University, Dhaka, Bangladesh  
29 ([dr.lailabanu@gmail.com](mailto:dr.lailabanu@gmail.com))

30 <sup>8</sup> Environmental Intervention Unit, International Centre for Diarrhoeal Diseases Research,  
31 Bangladesh (ICDDR,B), Dhaka-1212, Bangladesh (MUA: [mahbubalam@icddr.org](mailto:mahbubalam@icddr.org), AA:  
32 [atik.ahsan@icddr.org](mailto:atik.ahsan@icddr.org) )

33  
34 <sup>9</sup> Emergency Preparedness and Response Programme, WHO Regional Office for Africa, Dakar  
35 Hub, Dakar, Senegal (TT: [traoret@who.int](mailto:traoret@who.int))

36  
37 <sup>10</sup> Department of General Educational and Development, Daffodil International University,  
38 Dhaka, Bangladesh (MJU: [jamal-sta@sust.edu](mailto:jamal-sta@sust.edu))

39  
40 <sup>11</sup> School of Life Sciences, Faculty of Natural Sciences, Keele University, Keele, Staffordshire,  
41 United Kingdom, ST5 5BG (NH: [n.haider@keele.ac.uk](mailto:n.haider@keele.ac.uk), RG: [r.galizi@keele.ac.uk](mailto:r.galizi@keele.ac.uk) ).

42  
43 <sup>12</sup> School of Medicine, Faculty of Medicine and Health Sciences, Keele University,  
44 Staffordshire, ST5 5BG, United Kingdom (IR: [i.russo@keele.ac.uk](mailto:i.russo@keele.ac.uk) )

45  
46 <sup>13</sup> Division of Infection and Immunity, Centre for Clinical Microbiology, University College  
47 London and NIHR-BRC, University College London Hospitals, London, United Kingdom (AZ:  
48 [a.zumla@ucl.ac.uk](mailto:a.zumla@ucl.ac.uk)).

49  
50 **\*Corresponding author (NH):** Dr Najmul Haider, School of Life Sciences, Keele University,  
51 Huxley Building, Room 122, Keele, Staffordshire, ST5 5BG, United Kingdom,

52

53 **Abstract:**

54 **Background:** The objectives of this study were to compare the dengue virus (DENV) infection,  
55 deaths, case-fatality ratio, as well as meteorological parameters between the first and the  
56 recent decade (2000-2010 vs. 2011-2022) and to understand the trends, seasonality, and impact  
57 of change of temperature and rainfall pattern on transmission dynamics of Dengue in Bangladesh

58  
59 **Methods:** For the period 2000-2022, dengue cases and death data from Bangladesh's Ministry of  
60 Health and Family Welfare's website, and meteorological data from the Bangladesh Meteorological  
61 Department were analyzed. Mann-Kendall and Sen's slop tests were used for trends and variations  
62 and fitted a time series Poisson regression model to identify the impact of meteorological  
63 parameters on the incidence of dengue cases. A forecast of dengue cases was performed using an  
64 autoregressive integrated moving average model.

65  
66 **Results:** Over the past 22 years, a total of 244,246 dengue cases were reported including 849 deaths  
67 (Case fatality ratio [CFR] =0.34%). The mean annual number of dengue cases increased eight-fold  
68 during the second decade, with 2216 cases during 2000-2011 vs. 18,321 during 2012-2022. The  
69 mean annual deaths have doubled (21 vs. 46) although the overall CFR had decreased to one-third  
70 (0.69 vs 0.24). Between the periods, the annual temperature increased by 0.49 °C, and rainfall  
71 decreased by 314 mm despite increasing unusual rainfall in the pre-and-post monsoon period. An  
72 increasing trend of dengue cases is observed with a much stiffer rise after 2018. Monthly mean  
73 temperature (Incidence risk ratio [IRR]: 1.26), first-lagged rainfall (IRR: 1.08), and second-lagged  
74 rainfall (IRR: 1.17) were significantly associated with monthly dengue incidence.

75  
76 **Conclusions:** The increased local temperature and unusual rainfall might have contributed to the  
77 increased incidence of DENV infection in Bangladesh. Community engagement, vector control,  
78 and destruction of mosquito habitats are key to controlling dengue.

79  
80 **Keywords:** Dengue, Bangladesh, Climate change, Temperature, Rainfall

81

82

83 **Introduction:**

84 Dengue fever is a mosquito-borne diseases (MVD) caused by four distinct serotypes of the  
85 dengue virus (DENV) of the Flaviviridae family<sup>1</sup>. DENV is transmitted to humans by the bites  
86 of the female *Aedes* species mosquitoes including *Ae. aegypti* and *Ae. albopictus*<sup>1,2</sup>. DENV is  
87 endemic in over 125 countries of the world and the number of cases globally reported to WHO  
88 continues to increase every year<sup>3</sup>. Annually, an estimated 390 million dengue infections are  
89 recorded across the world, including 96 million clinical cases<sup>4,5</sup>. Most infections (>80%) are  
90 self-limiting with no or mild clinical manifestation resulting in lifelong immunity for serotype<sup>6</sup>.  
91 However, infections with different serotypes, known as secondary dengue infection, may result  
92 in severe dengue with a higher case-fatality ratio<sup>7</sup>.

93  
94 Currently, South and Southeast Asia is considered to be the hotspot of DENV infection with  
95 more than 50% of cases recorded in the regions<sup>8</sup>. The first official DENV outbreak in  
96 Bangladesh was reported in 2000, and since then, dengue has become endemic in the country  
97 posing a significant health challenge<sup>9</sup>. Over the past few years, the number of dengue cases has  
98 been steadily increasing with significant seasonal and regional variations. Analysis of data from  
99 2000 to 2017 revealed that almost half of the dengue cases occurred during the monsoon season  
100 (May-August) and the post-monsoon season (September-December)<sup>10</sup>. However, a shift in  
101 seasonal patterns has been observed since 2014, with dengue cases being reported during the pre-  
102 monsoon season as well<sup>10</sup>. During 2015-2017, the number of dengue cases during the pre-  
103 monsoon season was more than seven times higher compared to the previous 14 years<sup>10</sup>.

104

105 Climate change including changes in precipitation, temperature, and humidity, as well as rapid  
106 unplanned urbanization, were identified as strong predictors of an ecological imbalance that has  
107 led to an increase in dengue cases in Bangladesh<sup>10</sup>. This suggests that the dengue transmission  
108 season could eventually extend year-round, with a higher chance of outbreaks occurring at any  
109 time of the year. Identifying trends and seasonality in dengue cases can aid health authorities and  
110 relevant public and private administrations in effectively allocating resources to control the  
111 spread of the DENV through vector control. The objectives of our study were to: i) compare the  
112 annual and monthly cases in the first [2000-2010] and recent decade [2011-2022], ii) identify the  
113 trend and seasonality of dengue cases, iii) quantify the impact of climatic parameters for the  
114 monthly incidence of dengue cases in the country and iv) forecast the annual incidence of dengue  
115 cases for next decade.

116

## 117 **Methods:**

### 118 **Data sources:**

119 The data on the number of reported dengue-infected people have been extracted from the  
120 Directorate General of Health Services (DGHS)'s website from January 2000 to December 2022  
121<sup>11</sup>. We used the definition of dengue cases used by the Ministry of Health and Family Welfare,  
122 Bangladesh, which was discussed in our earlier article<sup>12</sup>. We collected three-hourly temperature  
123 and daily rainfall data from Bangladesh Meteorological Department (BMD) over the period  
124 2000–2022<sup>13</sup> for the meteorological station located in Mirpur, Dhaka.

125

### 126 **Variables**

127 The monthly number of dengue cases was used as the primary outcome variable. Two climatic  
128 variables- temperature and rainfall are used as the covariates for the regression analysis. In  
129 addition, two lagged variables rainfall in lag 1 and lag 2 have also been used as the predictors for  
130 the incidence of monthly dengue cases to capture the actual impact of those meteorological  
131 parameters. We also used monthly mortality data for comparison between two decades.

132

### 133 **Statistical analysis**

134 We analyzed the monthly dengue incidence and meteorological data for the period of 2000-2022.  
135 In the first stage, descriptive analysis was conducted to determine the characteristics of  
136 confirmed dengue cases and deaths with mean, and standard deviation in each year and each  
137 month for the entire period. Then, we compared dengue cases, deaths, and weather parameters in  
138 two decades (2000-2010 and 2011-2022) using paired sample t-test. Next, we calculated the  
139 monthly growth factor (GF) of dengue cases by dividing the number of dengue cases reported in  
140 each month by the number of dengue cases reported in the previous month and repeating this  
141 process for each month from 2000 to 2022<sup>14</sup>. The formula for the growth factor can be given by

$$142 \quad GF_t = \frac{N_{t+1} + 1}{N_t + 1}$$

143

144 where  $N_t$  indicates the number of dengue cases in  $t$ th month. To avoid the occurrence of zeros in  
145 some months, we added 1 to the total number of cases for each month. This allows us to obtain a  
146 real-valued measurement of the GF for the above equation. The distribution of GF was skewed;  
147 therefore, we used the first natural log transformation before the data was further examined.

148 However, we have also performed a reverse transformation of the log (GF) values by  
149 exponentiating values to convert them to the original scale for ease of interpretation<sup>14</sup>.  
150  
151 We performed forecasting using the autoregressive integrated moving average (ARIMA) model.  
152 The ARIMA model is a data-driven, exploratory strategy that enables us to fit a suitable model  
153 and forecast values. The ARIMA model consists of autoregressive (p) terms, differencing (d)  
154 terms, and moving average (q) operations, and it is denoted as ARIMA (p, d, q)<sup>15</sup>. To select the  
155 appropriate autoregressive and moving average orders, the autocorrelation function (ACF) and  
156 partial autocorrelation function (PACF) were examined. Additionally, the differencing  
157 parameter, represented by "d," indicates the number of times the time series is different to  
158 achieve stationarity. An ARIMA (p, d, q) process refers to an autoregressive moving average  
159 (ARMA) model that has been differenced "d" times to obtain stationarity ( Hasan et al. 2021). By  
160 removing high-frequency noise from the data, the model discovers local patterns by assuming  
161 that the time series values are linearly related. We also conducted a Mann-Kendall (M-K) trend  
162 analysis to determine possible upward or downward trends<sup>17</sup>. We also performed the Sen's slope  
163 test to assess variations in annual dengue cases and deaths<sup>18</sup>.  
164  
165 We, then used a time series count generalized linear model (GLM), more specifically, a time-  
166 series Poisson regression model to determine whether the climatic factors were associated with  
167 the dengue cases over time<sup>19</sup>. The non-normality, heteroscedasticity, and non-linearity that  
168 characterize count data can be fitted easily using GLMs. The time-series observations may  
169 possess autocorrelation and they might be nonnegative integers, and thus GLM is useful in  
170 overcoming both issues [20, 21, 22]. Monthly dengue cases were utilized as the outcome variable

171 in this model, along with data from the Bangladesh Meteorological Department (BMD) on  
172 temperature and rainfall. To capture the actual impact of rainfall on dengue incidence across  
173 time, we additionally employed two lagged variables of meteorological elements, mainly rainfall  
174 in lag 1 and 2. After eliminating predictors with a higher multicollinear relationship, we have  
175 arrived at average temperature, rainfall (in lag 1), and rainfall (in lag 2) as the final set of  
176 predictors for the monthly dengue incidence in Bangladesh. We used the statistical program  
177 RStudio, version 3.5.2.2 for the analyses <sup>20</sup>.

178

## 179 **Results:**

180 Between 2000 and 2022, Bangladesh reported a total of 244,246 DENV infection with an annual  
181 mean of 10,161 cases ( $\pm$  standard deviation [SD]=23,971) including 849 fatal outcomes  
182 indicating a case-fatality ratio (CFR) of 0.34%. Between 2000 to 2010, the mean annual number  
183 of DENV infection was 2,216 ( $\pm$ 2,123) which has increased over eight folds compared to the  
184 following decade (2011-2022) at 18,321 ( $\pm$ 31,778) (**Table 1**). Between these two periods, the  
185 mean number of annual deaths due to DENV infection has increased by 2.2 times (21.18 cases vs  
186 46.58 cases). However, the CFR of DENV infection has decreased to almost one-third between  
187 two decades (0.69 vs 0.24) (**Table 1**).

188

189 The highest monthly average number of DENV infections was recorded in August (n=3407  
190 cases) and the lowest was in February (n=7.3 cases) (**Fig 1**). The highest number of annual  
191 DENV infections was reported in 2019 with 101,354 and the highest number of deaths was  
192 recorded in 2022 with 281 deaths, which was 35% of total deaths recorded in the past 23 years in



193 Bangladesh (**Fig 1**). Most of the dengue-related deaths were recorded after 2018, with more than  
194 69% (n=550) deaths recorded during this time (**Fig 1**).

195  
196 The average annual temperature was 26.35 °C (SD=3.72) during the first decade (2000-2010)  
197 and 26.84 °C (SD=3.76) during the recent decade (2011-2022) (**Table 1**). The increase of 0.49 °  
198 C temperature was equivalent to 4292 degree-hour/year of heat (365 days X 24 hours X 0.49 °  
199 C). The annual rainfall has decreased by 314 mm between two decades (2078.66 mm vs. 1764.50  
200 mm) (**Table 1**), of which 308 mm decreased during the monsoon (July-October) season and only  
201 6 mm decreased during the non-monsoon period. Compared to the first decade (2000-2010), an  
202 unusually higher amount of monthly precipitation has been observed in the second decade (2011-  
203 2022) with most of the months recording extreme rainfall (more than 3<sup>rd</sup> quantile value of  
204 monthly rainfall for the decade) shown as an outlier of the box plot (**Fig 2**).

205  
206 The overall mean GF from month to month was 1.37 (SD=0.86). However, in four months  
207 (April-July), the monthly GF was above one (lower 95% confidence interval >1), while for the  
208 rest of the years, the monthly GF was less than 1 (95% confidence interval crossed 1). More  
209 than 77% (71/92) of months between April and July for the period 2000–2022 had mean monthly  
210 GF > 1 compared to only 16% (30/184) of months between August and March of the same  
211 period. June had the highest GF with a mean value of 3.47 indicating that cases would be more  
212 than three times higher in the next month (July). The lowest GF was recorded in December with  
213 a mean of 0.54 (95% CI: 0.40 to 0.69) indicating that cases in January would be halved  
214 compared to the number of cases recorded in December (**Fig. 3**). In the M-K trend analysis, we  
215 found a positive trend of reported dengue cases (p < 0.001 and tau = 0.26). In Sen's slope test, the

216 slope was 171.67 (95% CI: -46 to 687) indicating an upward trend in upcoming months (**Table**  
217 **2**).

218  
219 In the GLM, the estimated effect of each variable is presented as the incidence risk ratio (IRR).  
220 The model suggests that dengue cases would rise by 26% for a one-degree centigrade (°C)  
221 temperature increase. For each additional centimeter (cm) of rainfall in the first lagged month,  
222 the number of dengue cases increased by 8% (IRR= 1.08 [95% CI: 1.07-1.09]), and in the second  
223 lagged month increase the cases by 17% [IRR=1.17 (95% CI: 1.16 -1.18)] (**Table 3**).

224  
225 In the ARIMA model, we detected an increasing trend for the first few years, which then started  
226 to decline. However, a stiff rise in cases was observed after 2018 except for 2020 (the first year  
227 of the Covid-19 pandemic). The forecasted value showed a continuously increasing trend of  
228 DENV infection in Bangladesh (**Fig 4**).

229

230

## 231 **Discussions:**

232 Dengue is currently a worrying and important public health challenge for Bangladesh. Our  
233 analysis showed that the number of dengue cases has increased eight times and deaths have  
234 doubled, and the CFR dropped to one-third between the first and second decade of this century in  
235 Bangladesh. Between these periods, the annual temperature increased by 0.49 °C, and annual  
236 rainfall decreased by 314 mm, despite changes in rainfall patterns with unusually early or late  
237 rainfall outside the typical monsoon season in Bangladesh (July-October)<sup>21</sup>. The monthly

238 growth factor remains above one significantly for four months (April to July) which overlaps the  
239 hot and humid period of the year. Monthly mean temperature, monthly first-lagged rainfall, and  
240 second-lagged rainfall played a critical role in monthly dengue incidence in Bangladesh.

241  
242 The increase of 0.49 °C temperature adds approximately 4292-degree-hours equivalent heat per  
243 year in the country. This additional heat would favor mosquito-borne disease transmission. For  
244 dengue virus transmission, approximately 305-degree-hours equivalent heat is needed to  
245 accomplish the extrinsic incubation period in *Aedes* mosquitoes at 26° C<sup>22</sup>. Thus, the additional  
246 0.49°C temperature will add the burden of more than 14 generations of infectious mosquitoes in  
247 the environment of Bangladesh. An 8-fold increase in dengue cases is an indication of such  
248 changes in temperature in the country. Our model identified a significant role of monthly mean  
249 temperature with an additional 1 °C temperature increasing the monthly cases by 26%. Earlier  
250 studies showed that for every 1 °C increase in temperature, dengue cases increased by 61% in  
251 Australia, 12-22% in Cambodia, 5% in Vietnam, and 2.6% in Mexico<sup>23</sup>.

252  
253 Rainfall facilitates mosquito breeding and plays an important role in mosquito-borne disease  
254 transmission. Although we found a 15% reduction in annual rainfall in the recent decade from  
255 the immediate past decade, we found an increase in unusually high rainfall in pre-and-post  
256 monsoon season. Our model showed that both the first and the second lagged month's rainfall  
257 increased monthly cases by 8% and 17%, respectively. These findings are consistent with earlier  
258 studies in Bangladesh that showed that peak dengue cases occurred two months after the peak  
259 rainfall<sup>24</sup> or an additional rainy day per month increased dengue cases by 6% in the succeeding  
260 month<sup>25</sup>. Similar findings were reported in Vietnam with the dengue incidence being associated

261 with both first and second-lagged months<sup>26</sup>. In Timor-Leste, a 47% increase in dengue incidence  
262 was recorded with an additional 1 mm seasonal rainfall increase<sup>27</sup>. These findings are  
263 biologically plausible as rainfall allows approximately two generations of dengue cases over a  
264 month. A generation interval is a time difference between a primary human infection and a  
265 second human infection originating from the first human case through two bites of the  
266 mosquitoes<sup>28</sup>. To accomplish a generation interval the virus and mosquito undergo several  
267 phases including intrinsic incubation period in humans, human-mosquito transmission (first bite),  
268 extrinsic incubation period in mosquitoes, blood meal digestion period, and finally mosquitoes-  
269 to-human transmission (2<sup>nd</sup> bite)<sup>28</sup>. Ideally, for DENV, the generation interval completes at  
270 around 16 days at 28-32 °C<sup>28</sup>.

271  
272 Bangladesh's dengue season is characterized by hot and wet periods running between June to  
273 August. This is the period with the highest amount of rainfall in the country facilitating Aedes  
274 mosquito breeding in the country<sup>29</sup>. The monthly mean growth factor above 1 for April – June  
275 indicates that for each of these months, the incidence of dengue cases will surpass the current  
276 month. Thus, we suggest starting vector control intervention in April in Bangladesh.

277  
278 Globally and regionally in South and Southeast Asia, dengue cases are increasing. DENV  
279 infection increased by more than 46% between 2015 and 2019 in Region<sup>8</sup>. In 2023, up until 31  
280 May, a total of 1515,460 DENV infections were recorded in Brazil with 387 deaths<sup>30</sup>. In  
281 Malaysia, a total of 43,619 DENV infections have been recorded by 21 May 2023<sup>30</sup>. We found  
282 an increasing trend of DENV infection in Bangladesh. This increasing trend was much stiffer  
283 after the serotype DENV-3 was introduced in the country in 2018<sup>12</sup>. This increased trend is

284 possibly linked with climate change in the region attributed to increased temperature and unusual  
285 rainfall, urbanization, population growth, inadequate water supply and storage practice, poor  
286 sewer, and waste management system, rise in global commerce and tourism <sup>8</sup>.

287

288 The case fatality ratio (CFR) of primary dengue infection is very low with an estimation of  
289 0.018% - 0.1% <sup>31</sup>. However, the CFR of secondary dengue infection is high, although precise  
290 estimates are not available, some studies show more than 1% and reaching up to 4% <sup>32</sup>.

291 Bangladesh's overall CFR of dengue infection (0.34%) seems slightly higher considering the  
292 overall CFR reported in other South and Southeast Asian countries <sup>8</sup>. However, more than 69%  
293 of dengue-related deaths in Bangladesh were recorded after the introduction of the serotype  
294 DENV-3 in 2019. Thus, secondary infection is likely contributing to higher dengue-related  
295 deaths in Bangladesh. In addition, the CFR of the dengue virus infection might have been  
296 affected by a lack of active surveillance and missing the mild and asymptomatic cases, and not  
297 recording the cases outside the public hospital and few selected private hospitals in Bangladesh  
298 or weaker health care system in the country<sup>12</sup>. In some years, the CFR was very high, for  
299 example, in the year 2003, the CFR was 2.1 (total cases 486), in the year 2000, 1.68 (total cases  
300 5,551), and in 2022, 0.45 (total cases 62,382). On the other hand, the CFR decreased in the  
301 second decade. This improvement is probably associated with improved access to the health care  
302 system, a better understanding of the treatment protocol including the availability of clinical  
303 management guidelines and training for the health care providers, better availability of  
304 Information, Education, and Communication (IEC) materials, community engagement and  
305 expansion of surveillance system to more hospitals in the surveillance system across the county  
306 in the recent years, and overall improvement of the economic condition of the country <sup>33-35</sup>.

307  
308 Two large dengue outbreaks occurred in Bangladesh in the year 2019 and 2022 both  
309 characterized by unusual weather patterns and the occurrence of two different serotypes. The  
310 2019 outbreak was characterized by early rainfall of 120 mm in February compared to a monthly  
311 mean of 20 mm precipitation, along with the introduction of a new serotype of DENV-3 in the  
312 country <sup>12</sup>. The 2022 outbreak was characterized by the late onset of rainfall with 297 mm  
313 rainfall in October compared to a monthly mean of 156 mm, and thus prolongation of vector  
314 transmission season along with the introduction of a new serotype, DENV-4 in the country <sup>29</sup>.  
315 The occurrence of a new serotype exposed a large naïve population in a densely populated  
316 country like Bangladesh. A large proportion of the population is already infected with one of the  
317 serotypes of DENV with more than 80% of people living in Dhaka having antibodies against  
318 DENV <sup>24</sup>. Another study predicted an estimated 40 million people being infected with DENV  
319 nationally and 2.4 million annual infections <sup>36</sup>. Thus, any subsequent infections raise the risk of  
320 developing severe dengue hemorrhagic fever through antibody-dependent enhancement (ADE) <sup>7</sup>.  
321 The deaths of many people in the year 2022 when the new serotype DENV-4 was introduced  
322 were probably associated with secondary dengue infection.  
323  
324 Controlling vector-borne diseases in tropical countries where temperatures, humidity, and  
325 rainfall remain favorable for breeding mosquitoes during most periods of the year is a difficult  
326 task<sup>29</sup>. Concerns were raised over the development of insecticide resistance <sup>12,37</sup> and the failure of  
327 developing a successful dengue vaccine <sup>38</sup>. The prospect of *Wolbachia*-related intervention is  
328 bright but still far from applying on a national scale considering the expenses and technicalities  
329 associated with this. In this situation, an integrated and holistic vector management plan while

330 engaging the local communities is key for controlling Aedes-borne diseases, especially in  
331 resource-limited countries. Regular destruction of mosquito breeding sites and increasing  
332 surveillance for detecting active cases are key in controlling dengue virus infection. Continuous  
333 active dengue surveillance will enable early detection of cases and outbreaks. Public health  
334 authorities will be able to identify areas where the disease is spreading, take immediate action to  
335 control mosquito populations, isolate infected patients, and implement public awareness  
336 campaigns to educate people about preventive measures. Early detection and response can help  
337 prevent the further spread of the disease and reduce its impact on individuals and communities.  
338  
339 Regular destruction of mosquito breeding habitats and increasing surveillance for detecting  
340 active cases should prioritize in controlling dengue virus infection in Bangladesh. Policymakers  
341 need to design an Aedes-borne disease management plan by considering a range of diseases that  
342 Aedes mosquito can transmit including Chikungunya, yellow fever, Zika virus, West Nile,  
343 Japanese Encephalitis, Eastern Equine Encephalitis, Ross River, Rift Valley fever, and the  
344 LaCrosse virus<sup>29</sup>.  
345  
346 Our data should be viewed instead of several weaknesses of our study. We relied on the reported  
347 number of cases from the Ministry of Health and Family Welfare's website, which mainly relies  
348 on passive reporting systems from the selected health facilities in the country<sup>12</sup>. These numbers  
349 seem to be an underestimation of actual cases. A modeling study based on the national  
350 seroprevalence of DENV antibodies predicted an annual infection of 2.4 million cases<sup>39</sup>.  
351 However, dengue infection is underestimated globally as it is difficult to diagnose asymptomatic  
352 or mild cases that never reach healthcare settings. Although mild cases are missed more

353 frequently, the severe and fatal cases would likely visit the hospital and thus be counted as  
354 numerators in our estimation. Thus, our estimation did not overlook the worst-case scenario, that  
355 is, our estimation, for example, estimated the higher CFR rather than the lower possible  
356 estimates.

357

### 358 **Conclusions:**

359 Between the first (2000-2010) and the second decade (2011-2022), DENV infection have  
360 increased by 8.3 times, and annual deaths have doubled in Bangladesh. This growth of DENV  
361 infection is partly explained by the influence of global warming with an increase of 0.49°C  
362 annual temperature as well as changes in duration and length of the rainy season. Unusual rain  
363 including early or late rain in and beyond the monsoon season likely contributed to extending the  
364 length of the dengue transmission season in Bangladesh. The monthly mean temperature, and  
365 monthly total rainfall of the first-and -second lagged months showed a greater influence on the  
366 monthly incidence of DENV infection in Bangladesh. The mean monthly growth factor remains  
367 significantly above one during April-July, which coincides with the hot and rainy season of the  
368 country indicating an earlier vector control would benefit the country. The ARIMA model  
369 forecasts a continuously increasing trend of DENV infection for the next decade in Bangladesh.  
370 We recommend an integrated and holistic vector management plan while engaging the local  
371 communities in the regular destruction of mosquito breeding sites and increasing surveillance for  
372 detecting active DENV-infected cases. Proactive surveillance, vector control, and vaccine rollout  
373 remain essential public health interventions. In the context of climate change, urbanization, trade,  
374 and the movement of people with vectors, there is a need to operationalize the One Health  
375 approach to address dengue fever and other vector-borne diseases in Bangladesh and beyond.



376

377

378 **Acknowledgments:**

379

380 We are grateful to the Ministry of Health and Family Welfare of Bangladesh for publicly sharing  
381 the dengue cases data. We acknowledge Bangladesh Meteorological Department for sharing the  
382 meteorological data. NH, and AZ, are part of the PANDORA-ID-NET Consortium (EDCTP 373  
383 Reg/Grant RIA2016E-1609) funded by the European and Developing Countries Clinical Trials  
384 Partnership (EDCTP2) programme. NH is a member of the International Development Research  
385 Centre, Canada's grant on West African One Health Actions for understanding, preventing, and  
386 mitigating outbreaks (109810-001). AZ is a National Institutes of Health Research senior  
387 investigator, and a Mahathir Science Award and Pascoal Mocumbi Award laureate.

388

389

390 **Author contribution statement:** NH ideated the study and all authors helped develop the study outline and  
391 protocol. MNH and IK collected the data. NH, MNH, MA and AZ analyzed the data. NH, IK and MNH  
392 prepared the first draft manuscript and all authors contributed to several drafts and finalization of the  
393 manuscript. All authors approved the final draft and submission of the manuscript.

394

395 **Financial Support:** There was no funding for this research.

396 **Conflict of interest:** The authors declare that they have no conflict of interest.

397 **Ethics statement:** This study does not include any individual-level data and thus does not require any  
398 ethical approval. We used publicly available data on Dengue cases and deaths.

399 **Data availability statement:** All the dengue data presented in this manuscript are publicly available on  
400 Bangladesh's Ministry of Health and Family Welfare's Directorate General of Health Services website  
401 (<https://dghs.gov.bd/>). The meteorological data were purchased from Bangladesh Meteorological  
402 Department and are restricted to use for research purposes only and anyone interested in these data can  
403 request Bangladesh Meteorological Department (<https://live3.bmd.gov.bd/>).

404

## 405 **References**

- 406 1 WHO. DENGUE: GUIDELINES FOR DIAGNOSIS, TREATMENT, PREVENTION AND CONTROL. Geneva,  
407 Switzerland, 2009.
- 408 2 CDC. Transmission through mosquito bites. 2019.  
409 <https://www.cdc.gov/dengue/transmission/index.html> (accessed May 15, 2023).
- 410 3 WHO. Dengue and severe dengue. [https://www.who.int/news-room/fact-sheets/detail/dengue-](https://www.who.int/news-room/fact-sheets/detail/dengue-and-severe-dengue)  
411 [and-severe-dengue](https://www.who.int/news-room/fact-sheets/detail/dengue-and-severe-dengue). WHO. 2023; : 1–3.
- 412 4 WHO. Dengue and severe dengue. 2023. [https://www.who.int/news-room/fact-](https://www.who.int/news-room/fact-sheets/detail/dengue-and-severe-dengue)  
413 [sheets/detail/dengue-and-severe-dengue](https://www.who.int/news-room/fact-sheets/detail/dengue-and-severe-dengue) (accessed May 15, 2023).
- 414 5 Murray NEA, Quam MB, Wilder-Smith A. Epidemiology of dengue: past, present and future  
415 prospects. *Clin Epidemiol* 2013; **5**: 299–309.
- 416 6 WHO-Bangladesh. Dengue - Bangladesh. [https://www.who.int/emergencies/disease-outbreak-](https://www.who.int/emergencies/disease-outbreak-news/item/2022-DON424)  
417 [news/item/2022-DON424](https://www.who.int/emergencies/disease-outbreak-news/item/2022-DON424). 2022; published online Nov 28.
- 418 7 Teo A, Tan HD, Loy T, Chia PY, Chua CLL. Understanding antibody-dependent enhancement in  
419 dengue: Are afucosylated IgG1s a concern? *PLoS Pathog* 2023; **19**: e1011223.
- 420 8 WHO South-East Asia. Dengue in the South-East Asia. WHO Regional office for South-East Asia.  
421 2023; : 1–6.
- 422 9 Sharmin S, Viennet E, Glass K, Harley D. The emergence of dengue in Bangladesh: epidemiology,  
423 challenges and future disease risk. *Trans R Soc Trop Med Hyg* 2015; **109**: 619–27.
- 424 10 Mutsuddy P, Tahmina Jhora S, Shamsuzzaman AKM, Kaiser SMG, Khan MNA, Dhiman S. Dengue  
425 Situation in Bangladesh: An Epidemiological Shift in terms of Morbidity and Mortality. *Can J Infect*  
426 *Dis Med Microbiol* 2019; **2019**. DOI:10.1155/2019/3516284.
- 427 11 DGHS. DGHS. 2023. [https://old.dghs.gov.bd/index.php/bd/home/5200-daily-dengue-status-](https://old.dghs.gov.bd/index.php/bd/home/5200-daily-dengue-status-report)  
428 [report](https://old.dghs.gov.bd/index.php/bd/home/5200-daily-dengue-status-report) (accessed May 15, 2023).
- 429 12 Ahsan A, Haider N, Kock R, Benfield C. Possible Drivers of the 2019 Dengue Outbreak in  
430 Bangladesh: The Need for a Robust Community-Level Surveillance System. *J Med Entomol* 2021;  
431 **58**: 37–9.
- 432 13 BMD. Climate and Weather Data Portal | Bangladesh Meteorological Department. 2023.  
433 <http://www.bmddataportal.com/#/> (accessed May 15, 2023).
- 434 14 Haider N, Chang Y-M, Rahman M, Zumla A, Kock RA. Dengue outbreaks in Bangladesh: Historic  
435 epidemic patterns suggest earlier mosquito control intervention in the transmission season could  
436 reduce the monthly growth factor and extent of epidemics. *Current Research in Parasitology &*  
437 *Vector-Borne Diseases* 2021; **1**: 100063.

- 438 15 Kumar N, Susan S. COVID-19 Pandemic Prediction using Time Series Forecasting Models. In: 2020  
439 11th International Conference on Computing, Communication and Networking Technologies  
440 (ICCCNT). IEEE, 2020: 1–7.
- 441 16 Hasan MN, Haider N, Stigler FL, *et al.* The Global Case-Fatality Rate of COVID-19 Has Been  
442 Declining Since May 2020. *Am J Trop Med Hyg* 2021; **104**: 2176–84.
- 443 17 Yue S, Pilon P. A comparison of the power of the t test, Mann-Kendall and bootstrap tests for  
444 trend detection / Une comparaison de la puissance des tests t de Student, de Mann-Kendall et du  
445 bootstrap pour la détection de tendance. *Hydrological Sciences Journal* 2004; **49**: 21–37.
- 446 18 Sen PK. Estimates of the Regression Coefficient Based on Kendall's Tau. *J Am Stat Assoc* 1968; **63**:  
447 1379–89.
- 448 19 Sumi SN, Sinha NC, Islam MA. Generalized linear models for analyzing count data of rainfall  
449 occurrences. *SN Appl Sci* 2021; **3**: 481.
- 450 20 R Core Team. R: A language and environment for statistical computing. Vienna, Austria. URL  
451 <https://www.R-project.org/>. 2022.
- 452 21 Haider N, Rahman MS, Khan SU, *et al.* Identification and Epidemiology of a Rare HoBi-Like  
453 Pestivirus Strain in Bangladesh. *Transbound Emerg Dis* 2014; **61**: 193–8.
- 454 22 Focks DA, Daniels E, Haile DG, Keesling JE. A simulation model of the epidemiology of urban  
455 dengue fever: Literature analysis, model development, preliminary validation, and samples of  
456 simulation results. *American Journal of Tropical Medicine and Hygiene* 1995.  
457 DOI:10.4269/ajtmh.1995.53.489.
- 458 23 Soneja S, Tsarouchi G, Lumbroso D, Tung DK. A Review of Dengue's Historical and Future Health  
459 Risk from a Changing Climate. *Curr Environ Health Rep* 2021; **8**: 245–65.
- 460 24 Salje H, Morales I, Gurley ES, Saha S. Seasonal Distribution and Climatic Correlates of Dengue  
461 Disease in Dhaka, Bangladesh. *Am J Trop Med Hyg* 2016; **94**: 1359–61.
- 462 25 Rahman KM, Sharker Y, Rumi RA, *et al.* An Association between Rainy Days with Clinical Dengue  
463 Fever in Dhaka, Bangladesh: Findings from a Hospital Based Study. *Int J Environ Res Public Health*  
464 2020; **17**: 9506.
- 465 26 Cuong HQ, Hien NT, Duong TN, *et al.* Quantifying the Emergence of Dengue in Hanoi, Vietnam:  
466 1998–2009. *PLoS Negl Trop Dis* 2011; **5**: e1322.
- 467 27 Wangdi K, Clements ACA, Du T, Nery SV. Spatial and temporal patterns of dengue infections in  
468 Timor-Leste, 2005–2013. *Parasit Vectors* 2018; **11**: 9.
- 469 28 Siraj AS, Oidtmann RJ, Huber JH, *et al.* Temperature modulates dengue virus epidemic growth  
470 rates through its effects on reproduction numbers and generation intervals. *PLoS Negl Trop Dis*  
471 2017. DOI:10.1371/journal.pntd.0005797.
- 472 29 Haider N, Hasan MN, Khalil I, *et al.* The 2022 dengue outbreak in Bangladesh: hypotheses for the  
473 late resurgence of cases and fatalities. *J Med Entomol* 2023; published online May 18.  
474 DOI:10.1093/jme/tjad057.

- 475 30 European CDC. Dengue worldwide overview. ECDC. 2023; : 1–10.
- 476 31 Huits R, Schwartz E. Fatal outcomes of imported dengue fever in adult travelers from non-  
477 endemic areas are associated with primary infections. *J Travel Med* 2021; **28**.  
478 DOI:10.1093/jtm/taab020.
- 479 32 Liu Y, Lillepold K, Semenza JC, Tozan Y, Quam MBM, Rocklöv J. Reviewing estimates of the basic  
480 reproduction number for dengue, Zika and chikungunya across global climate zones. *Environ Res*.  
481 2020. DOI:10.1016/j.envres.2020.109114.
- 482 33 Diseases Control Division (DGHS). National guidelines for clinical management of Dengue  
483 syndrome. Dhaka, 2013.
- 484 34 WHO. Improving the quality of care in the public health system in Bangladesh: building on new  
485 evidence and current policy levers: Bangladesh Health Systems in Transition, Policy Notes. Dhaka  
486 , 2017.
- 487 35 Albis MLF, Bhadra SK, Chin B. Impact evaluation of contracting primary health care services in  
488 urban Bangladesh. *BMC Health Serv Res* 2019; **19**: 854.
- 489 36 Salje H, Paul KK, Paul R, *et al*. Nationally-representative serostudy of dengue in Bangladesh allows  
490 generalizable disease burden estimates. *Elife* 2019; **8**. DOI:10.7554/ELIFE.42869.
- 491 37 Al-Amin HM, Johora FT, Irish SR, *et al*. Insecticide resistance status of *Aedes aegypti* in  
492 Bangladesh. *Parasit Vectors* 2020; **13**: 622.
- 493 38 Wang TT, Sewatanon J, Memoli MJ, *et al*. IgG antibodies to dengue enhanced for FcγRIIIA binding  
494 determine disease severity. *Science (1979)* 2017; **355**: 395–8.
- 495 39 Salje H, Paul KK, Paul R, *et al*. Nationally-representative serostudy of dengue in Bangladesh allows  
496 generalizable disease burden estimates. *Elife* 2019; **8**. DOI:10.7554/eLife.42869.
- 497
- 498
- 499

500 **Tables:**

501 **Table 1: Comparison of dengue cases, deaths, and weather parameters between the first**  
 502 **(2000-20210) and the recent decade (2011-2022) in Bangladesh**

|                                                           | First decade (2000-2010)        | Recent decade (2011-2022)       | p-value |
|-----------------------------------------------------------|---------------------------------|---------------------------------|---------|
| Mean annual dengue cases ( $\pm$ Standard deviation [SD]) | 2216.64 ( $\pm$ 2123.62)        | 18321.92 ( $\pm$ 31,778.90)     | 0.219   |
| Mean annual dengue deaths ( $\pm$ SD)                     | 21.18 ( $\pm$ 30.69)            | 46.58 ( $\pm$ 90.90)            | 0.853   |
| Mean Case-fatality ratio ( $\pm$ SD)                      | 0.69 ( $\pm$ 0.79)              | 0.23 ( $\pm$ 13)                | 0.08    |
| Mean temperature $^{\circ}$ C ( $\pm$ SD)                 | 26.35 ( $\pm$ 0.49)             | 26.84 ( $\pm$ 0.37)             | <0.001  |
| Mean annual rainfall ( $\pm$ SD)                          | 2078.66 ( $\pm$ 459.68)<br>[mm] | 1764.50 ( $\pm$ 448.32)<br>[mm] | 0.188   |

503

504 **Table 2: The Mann-Kendell trend test of dengue cases in Bangladesh**

| Test                               |             |                         |
|------------------------------------|-------------|-------------------------|
| <i>Mann-Kendell trend analysis</i> | <b>Tau</b>  | <b>p-value</b>          |
|                                    | 0.26        | 0.139                   |
| <i>Sen's Slop test</i>             |             |                         |
|                                    | Sen's Slope | 95% Confidence Interval |
|                                    | 171.67      | -46 to 687              |

505

506 **Table 3: The incidence risk ratio (IRR) of average temperature and rainfall to Dengue**  
 507 **cases in Bangladesh using time-series count Generalized Linear Model.**

508

|                                | IRR (95% CI)          | P-value |
|--------------------------------|-----------------------|---------|
| Average temperature            | 1.26 (1.258 – 1.265)  | <0.001  |
| Rainfall (lag 1) in centimeter | 1.08 (1.079 – 1.086)  | <0.001  |
| Rainfall (lag 2) in centimeter | 1.17 (1.168 – 1.175)) | <0.001  |

509 **Fig 1:** Top: Number of dengue cases and deaths over the period 2000-2022, Bangladesh.  
 510 Bottom: Number of monthly dengue cases and deaths recorded in Bangladesh.

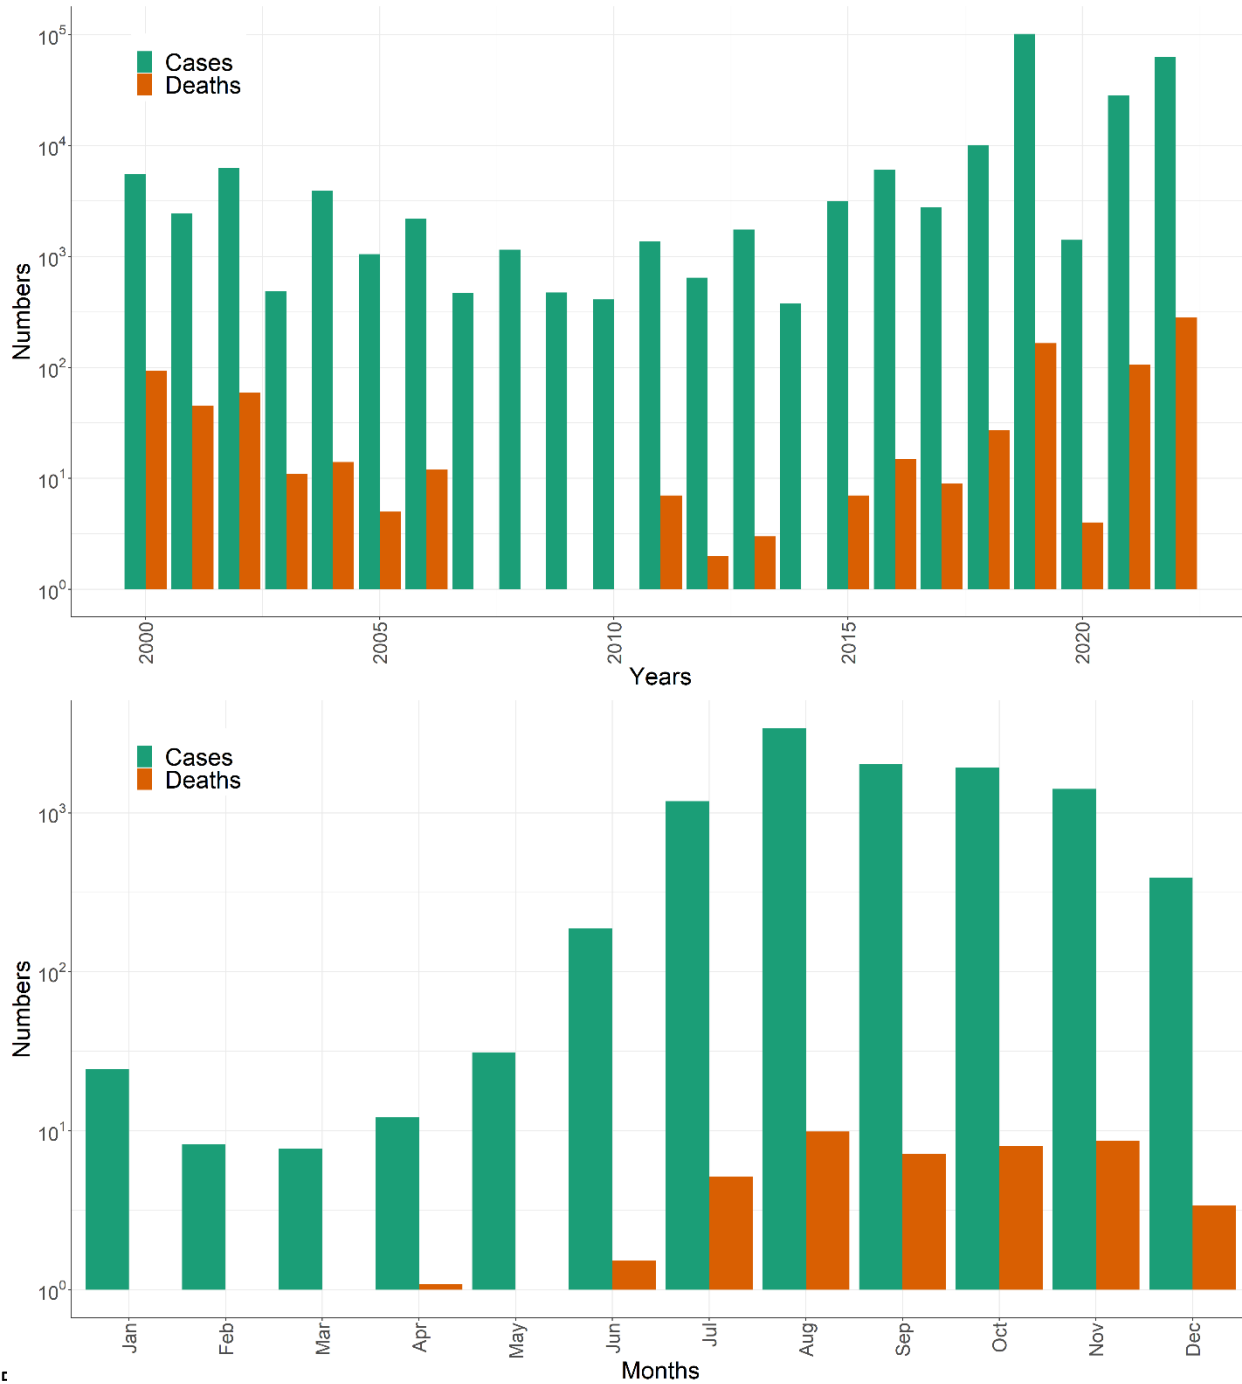

512  
 513  
 514

515 **Fig 2:** The boxplot compares monthly rainfall in Dhaka city, Bangladesh between two decades.  
516 The bottom and top of the box indicate the first and third quartiles, the band inside the box is the  
517 median. The dots outside the box are individual outliers. Most of the months in the second  
518 decade had outlier rainfall whereas in the first decade, only the cooler months (Nov-Jan) had  
519 some extreme rainfall.  
520

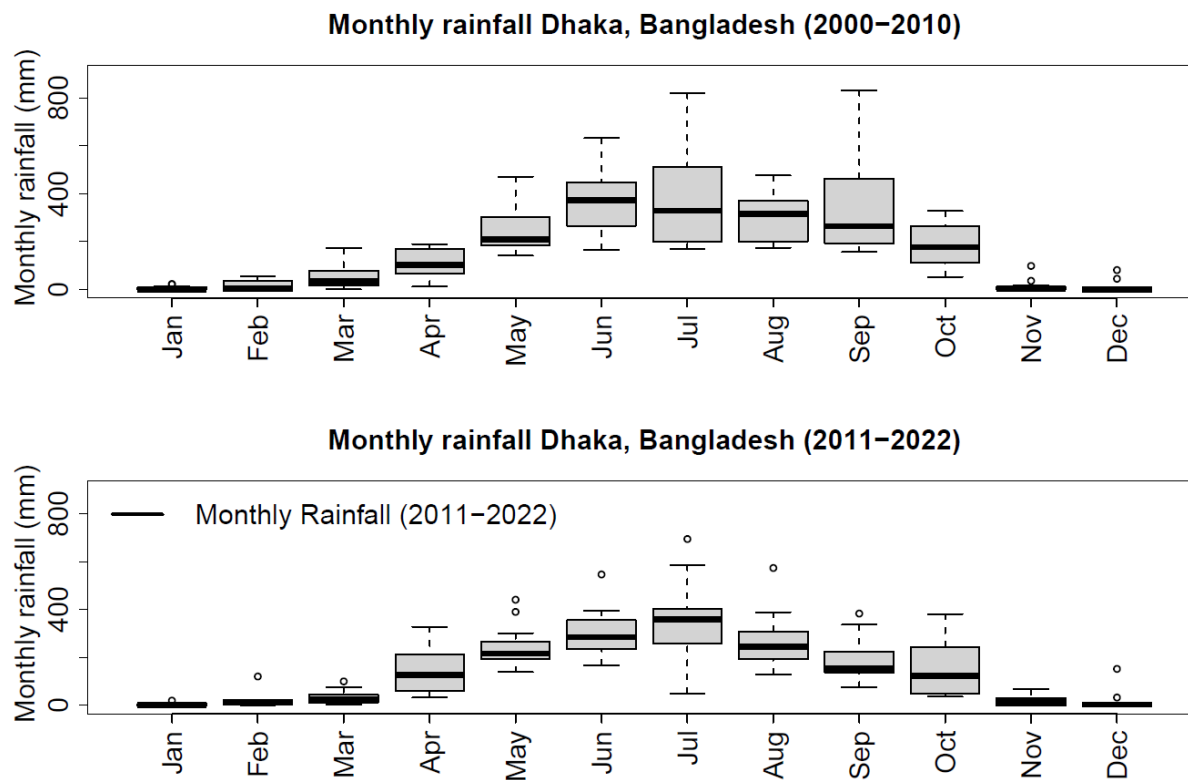

522  
523  
524  
525  
526  
527  
528  
529

530 **Fig 3: Top:** Mean monthly growth factor for the period of 2000-2022. Bottom: The Monthly  
531 growth factor for the individual year 2000-2022. The dotted horizontal line indicates monthly  
532 growth factor 1 (same number of cases in two subsequent months).

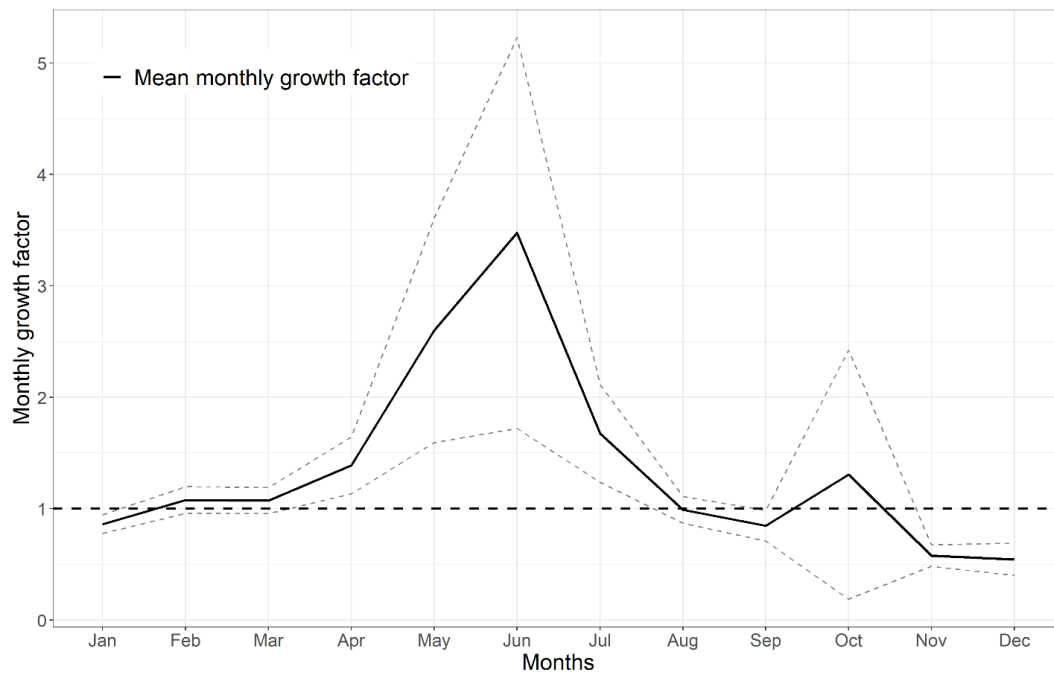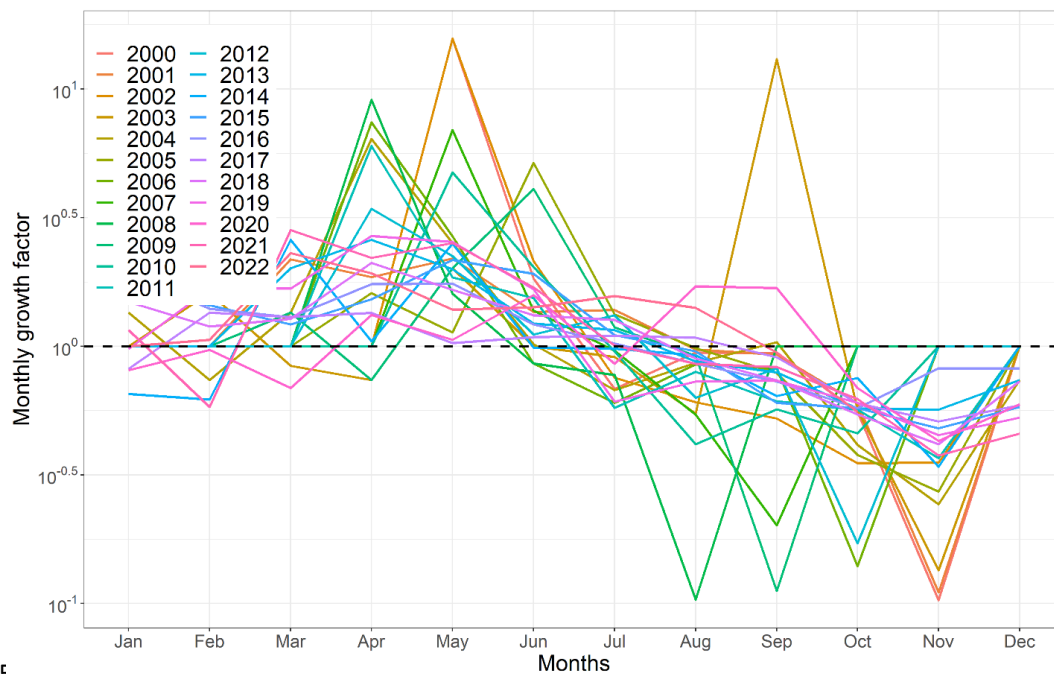

533

534

535



536 **Fig 4: Fig 3: Top:** Mean monthly growth factor for the period of 2000-2022. Bottom: The  
537 Monthly growth factor for the individual year 2000-2022. The dotted horizontal line indicates  
538 monthly growth factor 1 (same number of cases in two subsequent months).  
539

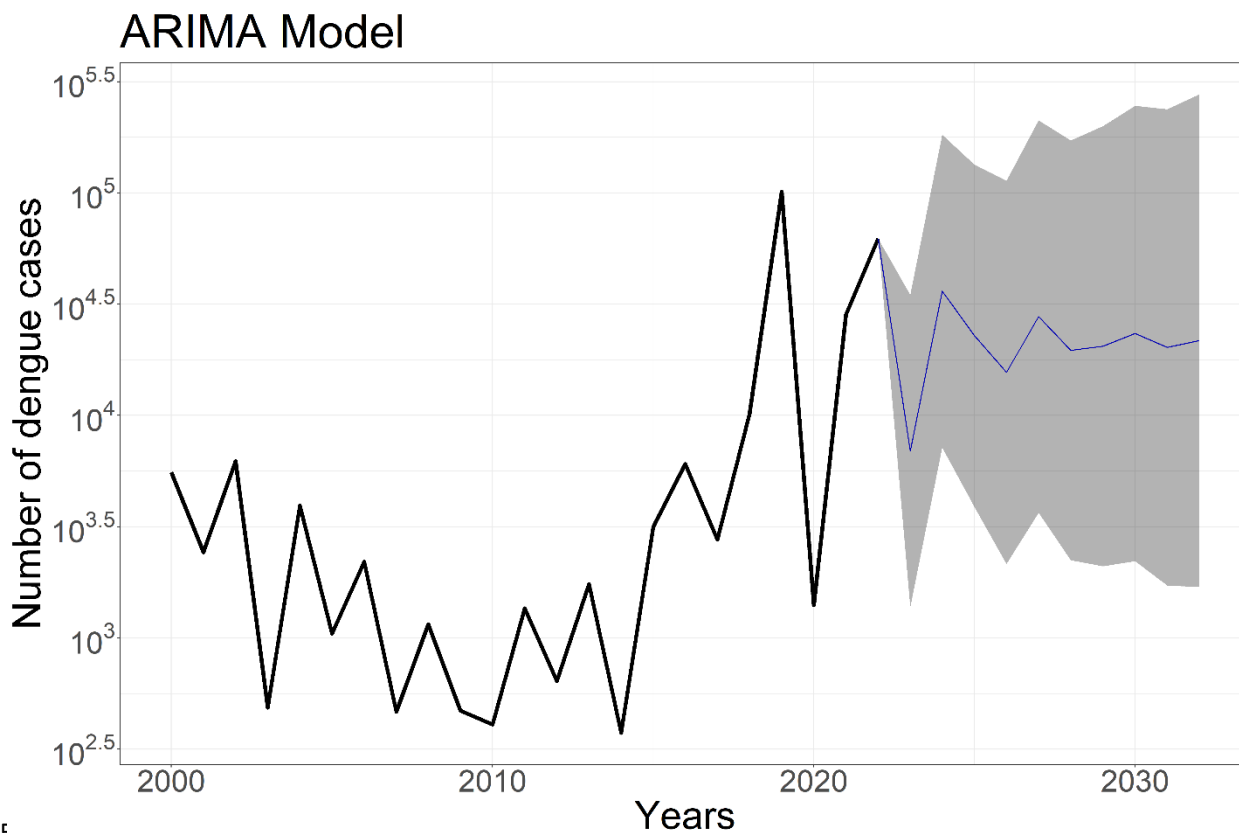

540  
541
